# Supplementary material for: Cross-reactive influenza virus-specific CD8+ T cells contribute to lymphoproliferation in Epstein-Barr virus-associated infectious mononucleosis
Source: JCI journal article supplement (doi:10.1172/jci25078), 2005-11-23
Supplement: sd1 [file 1]

**(EBV) BMLF1-stimulated T cell line**

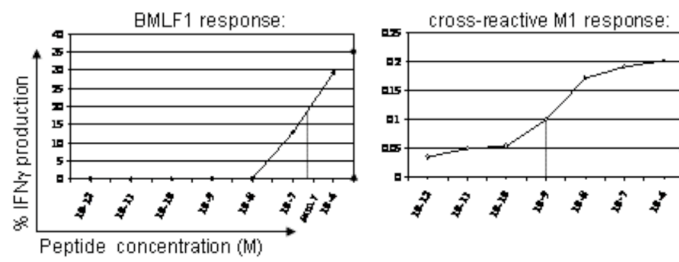

**Supplementary Figure 1**

*A BMLF1-specific T cell line demonstrates a difference in avidity for the BMLF1 versus the M1 peptide.* A preserved T cell line derived from healthy donor D-002 had been cultured for 4 weeks in the presence of BMLF1 peptide-pulsed T2 cells and was used in a standard intracellular IFN $\gamma$  assay that included a titration of peptide concentrations. ( $\blacktriangle$  tyrosinase,  $\circ$  M1,  $\bullet$  BMLF1 stimulation)

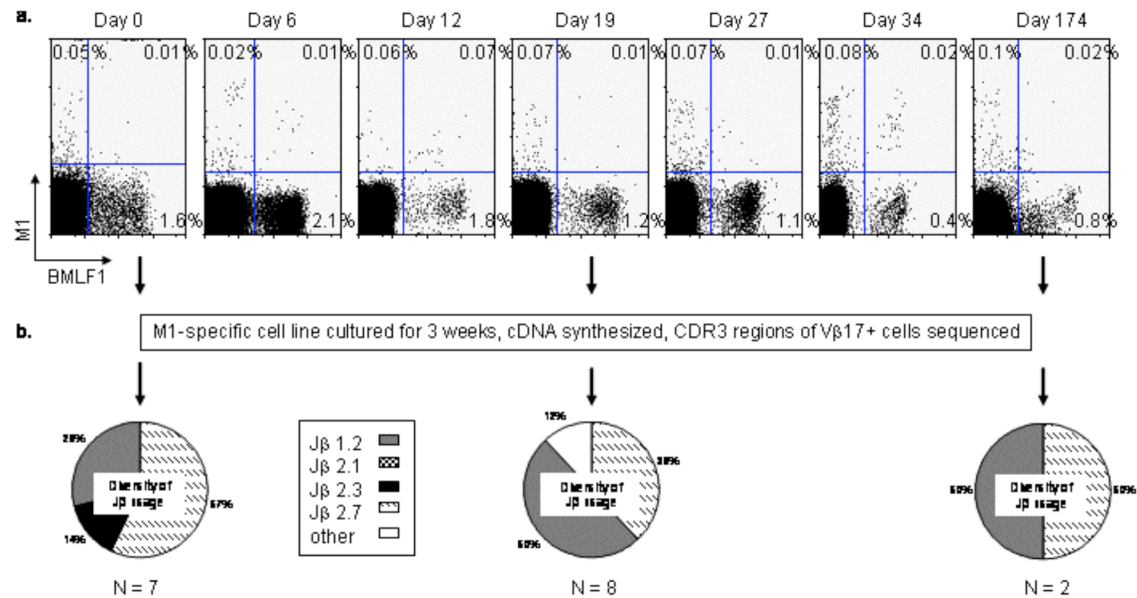

### Supplementary Figure 2

*Acute EBV infection selectively expands cross-reactive M1-specific memory cells that can recognize BMLF1.* CD8 T cells were isolated ex vivo from patient E1178 at various time points post-presentation with symptoms of acute infectious mononucleosis. (a) The percentages of CD8 T cells staining positive when co-stained with M1- and BMLF1-loaded tetramers are shown. The number of events shown is variable because the maximum number possible was collected for each sample. (b) CD8 T cells isolated at days 0, 19 and 174 were cultured for 3 weeks in the presence of M1 peptide-pulsed T2 cells. Following the RNA isolation and cDNA synthesis of those T cell lines, the CDR3 $\beta$  region of V $\beta$ 17+ sub-clones was sequenced. The pie charts illustrate the percentage of unique V $\beta$ 17+ sub-clones using each J $\beta$  family, where N = the total number of unique sub-clones. The complete CDR3 sequences of all the sub-clones analyzed are displayed in Supplementary Table 1, structured according to Chothia et al. (57).

# Supplementary Table 1

| A. IM patient: E1101 |        |       |      |    |                       |                                             |  |  |  |
|----------------------|--------|-------|------|----|-----------------------|---------------------------------------------|--|--|--|
| M1 line              | Length | 3D    | Freq | JL | 2AA seq of CDR3β loop | Nucleotide sequence of the V/NDN/J junction |  |  |  |
| Dav 22               | 7 AA   | H2.1  | 1    | 12 | AS-SIGLVGY-TF         | gccaatgattatggtctatgactacaccttc             |  |  |  |
|                      |        | H2.2  | 1    | 12 | AS-SIGVGY-TF          | gccaatgattatggtctatgactacaccttc             |  |  |  |
|                      |        | H2.3  | 1    | 12 | AS-SIGVGY-TF          | gccaatgattatggtctatgactacaccttc             |  |  |  |
|                      |        | H4.3  | 1    | 12 | AS-SIGVGY-TF          | gccaatgattatggtctatgactacaccttc             |  |  |  |
|                      | 8 AA   | H4.10 | 7    | 13 | AS-SIRSCNTI-YF        | gccaatgattatggtctatgactacaccttc             |  |  |  |
|                      |        | H2.6  | 4    | 21 | AS-STRAQVEQ-FF        | gccaatgattatggtctatgactacaccttc             |  |  |  |
|                      |        | H4.24 | 2    | 23 | AS-SGRSADTQ-YF        | gccaatgattatggtctatgactacaccttc             |  |  |  |
|                      |        | H2.10 | 2    | 23 | AS-SRRSTDQ-YF         | gccaatgattatggtctatgactacaccttc             |  |  |  |
|                      |        | H2.4  | 1    | 16 | AS-SIGVNYPL-HF        | gccaatgattatggtctatgactacaccttc             |  |  |  |
|                      |        | H2.5  | 1    | 21 | AS-SIRSGYEQ-FF        | gccaatgattatggtctatgactacaccttc             |  |  |  |
|                      |        | H2.7  | 1    | 21 | AS-SAGLASEQ-FF        | gccaatgattatggtctatgactacaccttc             |  |  |  |
|                      |        | H2.8  | 1    | 23 | AS-SIRSTDQ-YF         | gccaatgattatggtctatgactacaccttc             |  |  |  |
|                      |        | H5.19 | 1    | 23 | AS-SIRSTDQ-YF         | gccaatgattatggtctatgactacaccttc             |  |  |  |
|                      |        | H2.9  | 1    | 23 | AS-SGRSTDQ-YF         | gccaatgattatggtctatgactacaccttc             |  |  |  |
| Dav 165              | 7 AA   | H4.1  | 6    | 12 | AS-SIGVGY-TF          | gccaatgattatggtctatgactacaccttc             |  |  |  |
|                      |        | H4.3  | 5    | 12 | AS-SIGVGY-TF          | gccaatgattatggtctatgactacaccttc             |  |  |  |
|                      |        | H4.2  | 1    | 12 | AS-SIGVGY-TF          | gccaatgattatggtctatgactacaccttc             |  |  |  |
|                      |        | H4.4  | 1    | 12 | AS-SIGVGY-TF          | gccaatgattatggtctatgactacaccttc             |  |  |  |
|                      |        | H4.5  | 1    | 12 | AS-SIGVGY-TF          | gccaatgattatggtctatgactacaccttc             |  |  |  |
|                      |        | H4.6  | 1    | 12 | AS-SIGVGY-TF          | gccaatgattatggtctatgactacaccttc             |  |  |  |
|                      |        | H4.7  | 1    | 12 | AS-SIGVGY-TF          | gccaatgattatggtctatgactacaccttc             |  |  |  |
|                      |        | H4.8  | 1    | 12 | AS-SIGVGY-TF          | gccaatgattatggtctatgactacaccttc             |  |  |  |
|                      | 8 AA   | H4.9  | 1    | 12 | AS-SIGVGY-TF          | gccaatgattatggtctatgactacaccttc             |  |  |  |
|                      |        | H4.13 | 9    | 23 | AS-SIRSTDQ-YF         | gccaatgattatggtctatgactacaccttc             |  |  |  |
|                      |        | H4.10 | 7    | 13 | AS-SIRSCNTI-YF        | gccaatgattatggtctatgactacaccttc             |  |  |  |
|                      |        | H4.19 | 4    | 23 | AS-SRRSTDQ-YF         | gccaatgattatggtctatgactacaccttc             |  |  |  |
|                      |        | H4.21 | 2    | 21 | AS-SIRSTDQ-YF         | gccaatgattatggtctatgactacaccttc             |  |  |  |
|                      |        | H4.22 | 2    | 23 | AS-SIRSTDQ-YF         | gccaatgattatggtctatgactacaccttc             |  |  |  |
| Dav 349              | 6 AA   | 5.1   | 1    | 21 | AS-SIRSTDQ-YF         | gccaatgattatggtctatgactacaccttc             |  |  |  |
|                      | 7 AA   | 4.6   | 2    | 12 | AS-SIGVGY-TF          | gccaatgattatggtctatgactacaccttc             |  |  |  |
|                      |        | 4.1   | 2    | 12 | AS-SIGVGY-TF          | gccaatgattatggtctatgactacaccttc             |  |  |  |
|                      |        | 4.3   | 1    | 12 | AS-SIGVGY-TF          | gccaatgattatggtctatgactacaccttc             |  |  |  |
|                      |        | 5.30  | 1    | 12 | AS-SIGVGY-TF          | gccaatgattatggtctatgactacaccttc             |  |  |  |
|                      |        | 5.2   | 1    | 12 | AS-SIGVGY-TF          | gccaatgattatggtctatgactacaccttc             |  |  |  |
|                      |        | 5.3   | 1    | 12 | AS-SIGVGY-TF          | gccaatgattatggtctatgactacaccttc             |  |  |  |
|                      |        | 4.8   | 1    | 12 | AS-SIGVGY-TF          | gccaatgattatggtctatgactacaccttc             |  |  |  |
|                      |        | 5.4   | 1    | 12 | AS-SIGVGY-TF          | gccaatgattatggtctatgactacaccttc             |  |  |  |
|                      | 8 AA   | 4.10  | 9    | 13 | AS-SIRSCNTI-YF        | gccaatgattatggtctatgactacaccttc             |  |  |  |
|                      |        | 5.9   | 6    | 27 | AS-SIRSGYEQ-FF        | gccaatgattatggtctatgactacaccttc             |  |  |  |
|                      |        | 5.19  | 5    | 23 | AS-SIRSTDQ-YF         | gccaatgattatggtctatgactacaccttc             |  |  |  |
|                      |        | 4.28  | 4    | 27 | AS-SIRSGYEQ-FF        | gccaatgattatggtctatgactacaccttc             |  |  |  |
|                      |        | 4.24  | 3    | 23 | AS-SGRSADTQ-YF        | gccaatgattatggtctatgactacaccttc             |  |  |  |
| Dav 174              | 7 AA   | 5.1   | 1    | 21 | AS-SIRSTDQ-YF         | gccaatgattatggtctatgactacaccttc             |  |  |  |
|                      |        | 5.11  | 2    | 15 | AS-SIRSGYEQ-FF        | gccaatgattatggtctatgactacaccttc             |  |  |  |
|                      |        | 4.13  | 2    | 23 | AS-SIRSGYEQ-FF        | gccaatgattatggtctatgactacaccttc             |  |  |  |
|                      |        | 5.9   | 2    | 27 | AS-SIRSGYEQ-FF        | gccaatgattatggtctatgactacaccttc             |  |  |  |
|                      |        | 5.5   | 1    | 13 | AS-SIRSCNTI-YF        | gccaatgattatggtctatgactacaccttc             |  |  |  |
|                      |        | 5.6   | 1    | 16 | AS-SIRSSNFI-HF        | gccaatgattatggtctatgactacaccttc             |  |  |  |
|                      |        | 5.20  | 1    | 21 | AS-SIRSSNFI-HF        | gccaatgattatggtctatgactacaccttc             |  |  |  |
|                      |        | 5.17  | 2    | 22 | AS-SIRSSNFI-HF        | gccaatgattatggtctatgactacaccttc             |  |  |  |
|                      |        | 4.25  | 1    | 23 | AS-SIRSTDQ-YF         | gccaatgattatggtctatgactacaccttc             |  |  |  |
|                      |        | 5.14  | 1    | 23 | AS-SIRSTDQ-YF         | gccaatgattatggtctatgactacaccttc             |  |  |  |
|                      |        | 5.15  | 1    | 23 | AS-SIRSTDQ-YF         | gccaatgattatggtctatgactacaccttc             |  |  |  |
|                      |        | 5.16  | 1    | 23 | AS-SIRSTDQ-YF         | gccaatgattatggtctatgactacaccttc             |  |  |  |
|                      |        | 4.19  | 1    | 23 | AS-SIRSTDQ-YF         | gccaatgattatggtctatgactacaccttc             |  |  |  |
|                      |        | 5.18  | 1    | 23 | AS-SIRSTDQ-YF         | gccaatgattatggtctatgactacaccttc             |  |  |  |
| Dav 175              | 7 AA   | 5.1   | 1    | 21 | AS-SIRSTDQ-YF         | gccaatgattatggtctatgactacaccttc             |  |  |  |
|                      |        | 5.11  | 2    | 15 | AS-SIRSGYEQ-FF        | gccaatgattatggtctatgactacaccttc             |  |  |  |
|                      |        | 4.13  | 2    | 23 | AS-SIRSGYEQ-FF        | gccaatgattatggtctatgactacaccttc             |  |  |  |
|                      |        | 5.9   | 2    | 27 | AS-SIRSGYEQ-FF        | gccaatgattatggtctatgactacaccttc             |  |  |  |
|                      |        | 5.5   | 1    | 13 | AS-SIRSCNTI-YF        | gccaatgattatggtctatgactacaccttc             |  |  |  |
|                      |        | 5.6   | 1    | 16 | AS-SIRSSNFI-HF        | gccaatgattatggtctatgactacaccttc             |  |  |  |
|                      |        | 5.20  | 1    | 21 | AS-SIRSSNFI-HF        | gccaatgattatggtctatgactacaccttc             |  |  |  |
|                      |        | 5.17  | 2    | 22 | AS-SIRSSNFI-HF        | gccaatgattatggtctatgactacaccttc             |  |  |  |
|                      |        | 4.25  | 1    | 23 | AS-SIRSTDQ-YF         | gccaatgattatggtctatgactacaccttc             |  |  |  |
|                      |        | 5.14  | 1    | 23 | AS-SIRSTDQ-YF         | gccaatgattatggtctatgactacaccttc             |  |  |  |
|                      |        | 5.15  | 1    | 23 | AS-SIRSTDQ-YF         | gccaatgattatggtctatgactacaccttc             |  |  |  |
|                      |        | 5.16  | 1    | 23 | AS-SIRSTDQ-YF         | gccaatgattatggtctatgactacaccttc             |  |  |  |
|                      |        | 4.19  | 1    | 23 | AS-SIRSTDQ-YF         | gccaatgattatggtctatgactacaccttc             |  |  |  |
|                      |        | 5.18  | 1    | 23 | AS-SIRSTDQ-YF         | gccaatgattatggtctatgactacaccttc             |  |  |  |
| Dav 176              | 7 AA   | 5.1   | 1    | 21 | AS-SIRSTDQ-YF         | gccaatgattatggtctatgactacaccttc             |  |  |  |
|                      |        | 5.11  | 2    | 15 | AS-SIRSGYEQ-FF        | gccaatgattatggtctatgactacaccttc             |  |  |  |
|                      |        | 4.13  | 2    | 23 | AS-SIRSGYEQ-FF        | gccaatgattatggtctatgactacaccttc             |  |  |  |
|                      |        | 5.9   | 2    | 27 | AS-SIRSGYEQ-FF        | gccaatgattatggtctatgactacaccttc             |  |  |  |
|                      |        | 5.5   | 1    | 13 | AS-SIRSCNTI-YF        | gccaatgattatggtctatgactacaccttc             |  |  |  |
|                      |        | 5.6   | 1    | 16 | AS-SIRSSNFI-HF        | gccaatgattatggtctatgactacaccttc             |  |  |  |
|                      |        | 5.20  | 1    | 21 | AS-SIRSSNFI-HF        | gccaatgattatggtctatgactacaccttc             |  |  |  |
|                      |        | 5.17  | 2    | 22 | AS-SIRSSNFI-HF        | gccaatgattatggtctatgactacaccttc             |  |  |  |
|                      |        | 4.25  | 1    | 23 | AS-SIRSTDQ-YF         | gccaatgattatggtctatgactacaccttc             |  |  |  |
|                      |        | 5.14  | 1    | 23 | AS-SIRSTDQ-YF         | gccaatgattatggtctatgactacaccttc             |  |  |  |
|                      |        | 5.15  | 1    | 23 | AS-SIRSTDQ-YF         | gccaatgattatggtctatgactacaccttc             |  |  |  |
|                      |        | 5.16  | 1    | 23 | AS-SIRSTDQ-YF         | gccaatgattatggtctatgactacaccttc             |  |  |  |
|                      |        | 4.19  | 1    | 23 | AS-SIRSTDQ-YF         | gccaatgattatggtctatgactacaccttc             |  |  |  |
|                      |        | 5.18  | 1    | 23 | AS-SIRSTDQ-YF         | gccaatgattatggtctatgactacaccttc             |  |  |  |

<sup>1</sup> Length of CDR3β loop according to Chothia et al., shown supported by 2 flanking framework regions <sup>2</sup> Each donotype is distinguished by a unique nucleotide sequence at the V/NDN/J

All of the Vβ17+ sub-clones analyzed in this study are shown. <sup>1,2</sup> Each sub-clone is distinguished by the unique nucleotide sequence of the CDR3 loop of the TCR β-chain with length according to Chothia et al. (57). <sup>3</sup> Bolded residues represent the N/D/N region of the CDR3β loop.
